# Supplementary material for: Receptor for Advanced Glycation End-Products Promotes Activation of Alveolar Macrophages through the NLRP3 Inflammasome/TXNIP Axis in Acute Lung Injury
Source: Int J Mol Sci. 2022 Oct 1;23(19):11659. doi: 10.3390/ijms231911659 (PMC9569658; doi:10.3390/ijms231911659)
Supplement: Supplementary file 1 [file ijms-23-11659-s001.zip › ijms-1870995-supplementary.pdf]

## **ONLINE DATA SUPPLEMENT**

### **Receptor for Advanced Glycation End-Products and NLRP3 Inflammasome-driven Macrophage Activation in Acute Lung Injury**

Woodys Lenga Ma Bonda, Marianne Fournet, Ruoyang Zhai, Jean Lutz, Raiko Blondonnet, Céline Bourgne, Charlotte Leclaire, Cécile Saint-Béat, Camille Theilliere, Corinne Belville, Damien Bouvier, Loic Blanchon, Marc Berger, Vincent Sapin, Matthieu Jabaudon

## Supplementary figure legends

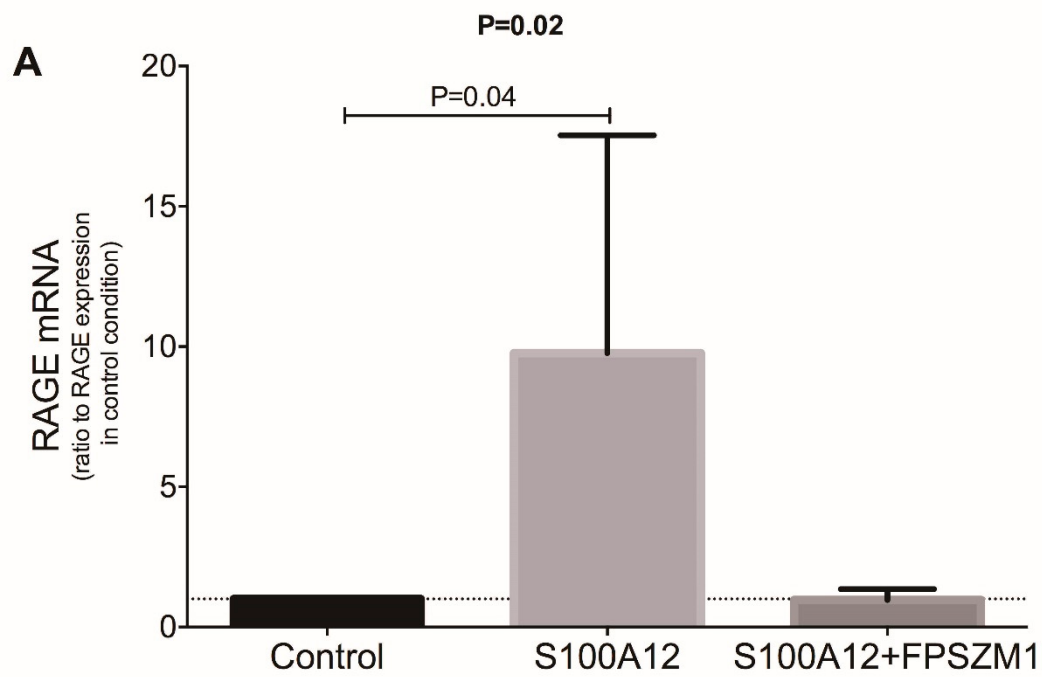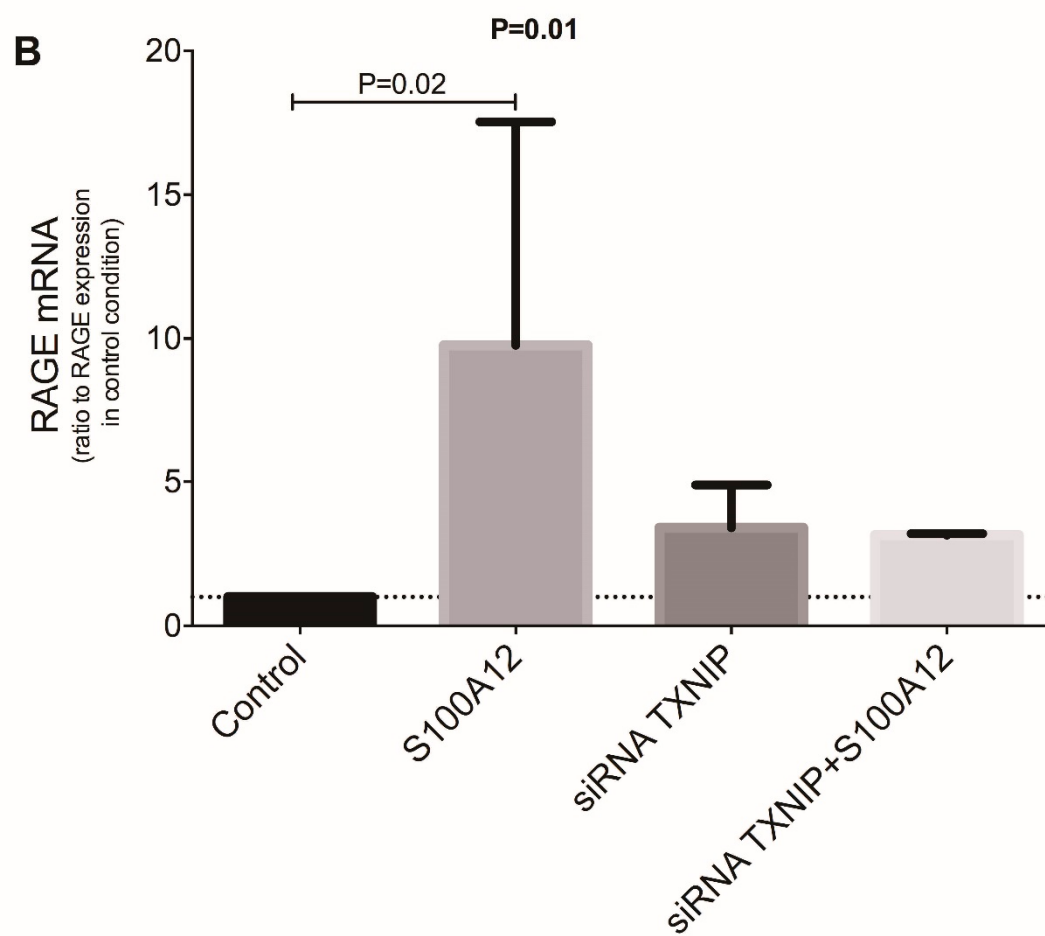

**Figure S1.** **A)** Levels of RAGE mRNA in THP-1 cells treated for 24 hours in the presence or absence of the RAGE agonist S100A12 (40 nM) (MyBiosource), alone or in combination with the RAGE antagonist FPS-ZM1 (1 $\mu$ M) (EMD Millipore), and **B)** in THP-1 cells transfected with specific small interfering (siRNA) oligonucleotides for mouse thioredoxin-interacting protein (TXNIP) (Dharmacon) and treated with S100A12 or phosphate-buffered saline (control). The efficiency of siRNA knockdown was verified using a duplicate enzyme-linked immunosorbent assay of TXNIP (CycLex Co.). Threshold levels of mRNA expression ( $\Delta\Delta$ Ct) were normalized to housekeeping genes. mRNA expression levels are expressed as ratios to those in the control condition ( $n = 6$  in duplicate for each condition). Data are representative of three independent observations. Values are reported as means  $\pm$  SD. The data were analyzed with the Kruskal–Wallis test (nonparametric data).

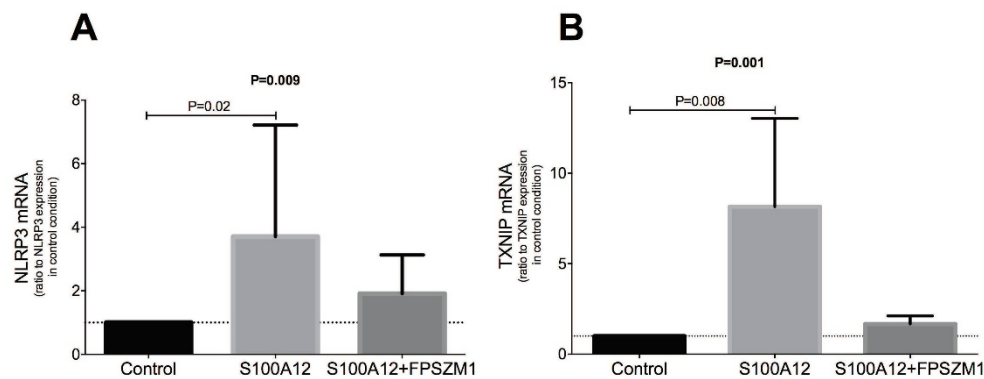

**Figure S2.** mRNA expression levels of **A)** NLRP3 and **B)** TXNIP in THP-1 cells treated for 24 hours in the presence or absence of the RAGE agonist S100A12 (40 nM) (MyBiosource), alone or in combination with the RAGE antagonist FPS-ZM1 (1 $\mu$ M) (EMD Millipore). Threshold levels of mRNA expression ( $\Delta\Delta$ Ct) were normalized to housekeeping genes. mRNA expression levels are expressed as ratios to those in the control condition ( $n = 6$  in duplicate for each condition). Values are reported as means  $\pm$  SD. The data were analyzed with the Kruskal–Wallis test (nonparametric data).

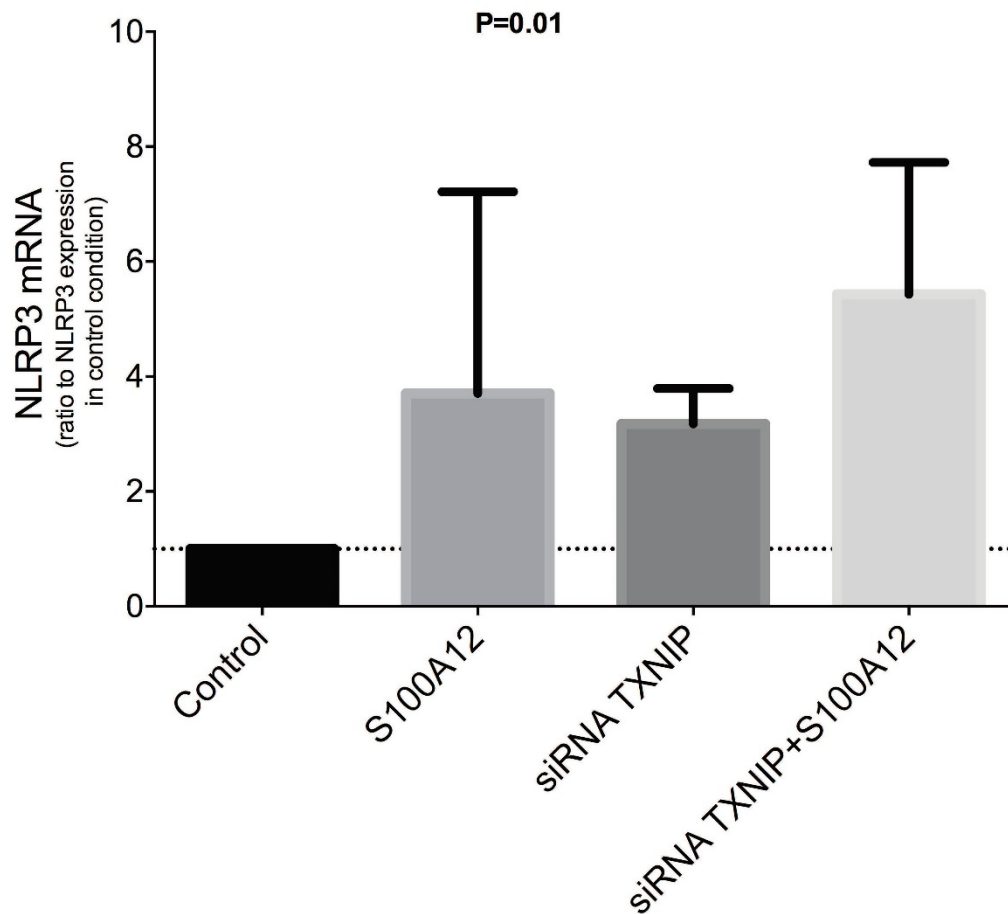

**Figure S3.** mRNA expression levels of NLRP3 in THP-1 cells transfected with specific small interfering (siRNA) oligonucleotides for mouse thioredoxin-interacting protein (TXNIP) (Dharmacon) and treated with S100A12 or phosphate-buffered saline (control). The efficiency of siRNA knockdown was verified using a duplicate enzyme-linked immunosorbent assay of TXNIP (CycLex Co.). Threshold levels of mRNA expression ( $\Delta\Delta C_t$ ) were normalized to housekeeping genes. mRNA expression levels are expressed as ratios to those in the control condition ( $n = 6$  in duplicate for each condition). Data are representative of three independent observations. Values are reported as means  $\pm$  SD. The data were analyzed with the Kruskal–Wallis test (nonparametric data).

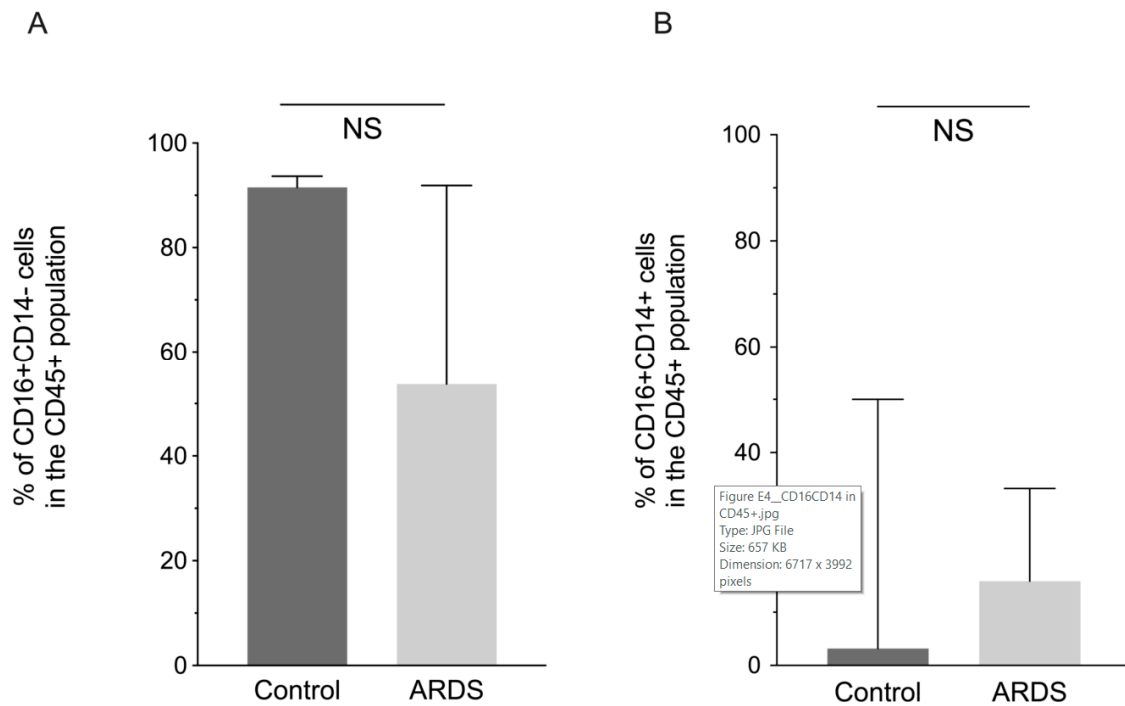

**Figure S4.** Percentages of **A)** CD16+CD14- cells in the CD45+ subpopulation and **B)** CD16+CD14+ cells in the CD45+ subpopulation of alveolar macrophages from patients with acute respiratory distress syndrome (ARDS) and in mechanically ventilated patients without ARDS (control). Values are reported as medians  $\pm$  interquartile ranges. The data were analyzed using the Mann–Whitney test (nonparametric data).

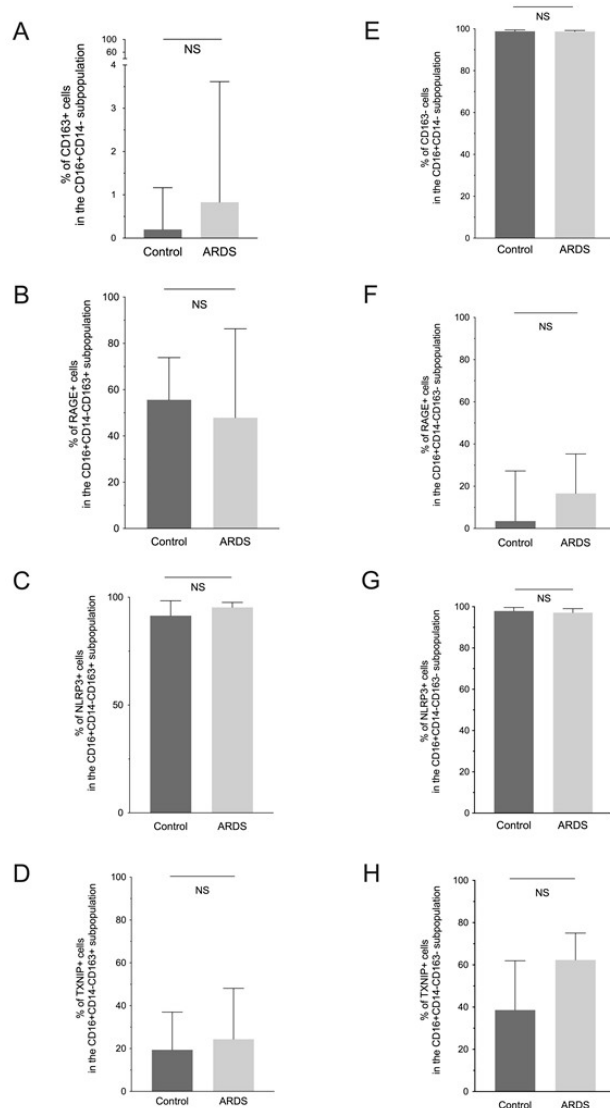

**Figure S5.** Percentages of **A)** CD163+ cells in the CD16+CD14- subpopulation, **B)** RAGE+ cells in the CD16+CD14-CD163+ subpopulation, **C)** NLRP3+ cells in the CD16+CD14-CD163+ subpopulation, **D)** TXNIP+ cells in the CD16+CD14-CD163+ subpopulation, **E)** CD163- cells in the CD16+CD14- subpopulation, **F)** RAGE+ cells in the CD16+CD14-CD163- subpopulation, **G)** NLRP3+ cells in the CD16+CD14-CD163- subpopulation, and **H)** TXNIP+ cells in the CD16+CD14-CD163- subpopulation of alveolar macrophages from patients with ARDS and in mechanically ventilated patients without ARDS (control). Values are reported as medians  $\pm$  interquartile ranges. The data were analyzed using the Mann–Whitney test (nonparametric data).

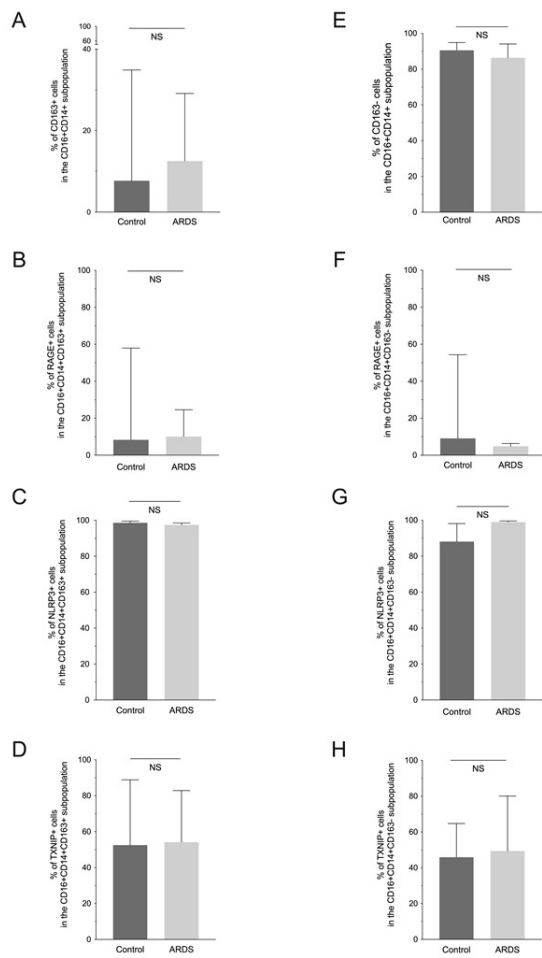

**Figure S6.** Percentages of **A)** CD163+ cells in the CD16+CD14+ subpopulation, **B)** RAGE+ cells within the CD16+CD14+CD163+ subpopulation, **C)** NLRP3+ cells in the CD16+CD14+CD163+ subpopulation, **D)** TXNIP+ cells in the CD16+CD14+CD163+ subpopulation, **E)** CD163- cells in the CD16+CD14- subpopulation, **F)** RAGE+ cells in the CD16+CD14+CD163- subpopulation, **G)** NLRP3+ cells in the CD16+CD14+CD163- subpopulation, and **H)** TXNIP+ cells in the CD16+CD14+CD163- subpopulation of alveolar macrophages from patients with ARDS and in mechanically ventilated patients without ARDS (control). Values are reported as medians  $\pm$  interquartile ranges. The data were analyzed using the Mann–Whitney test (nonparametric data).

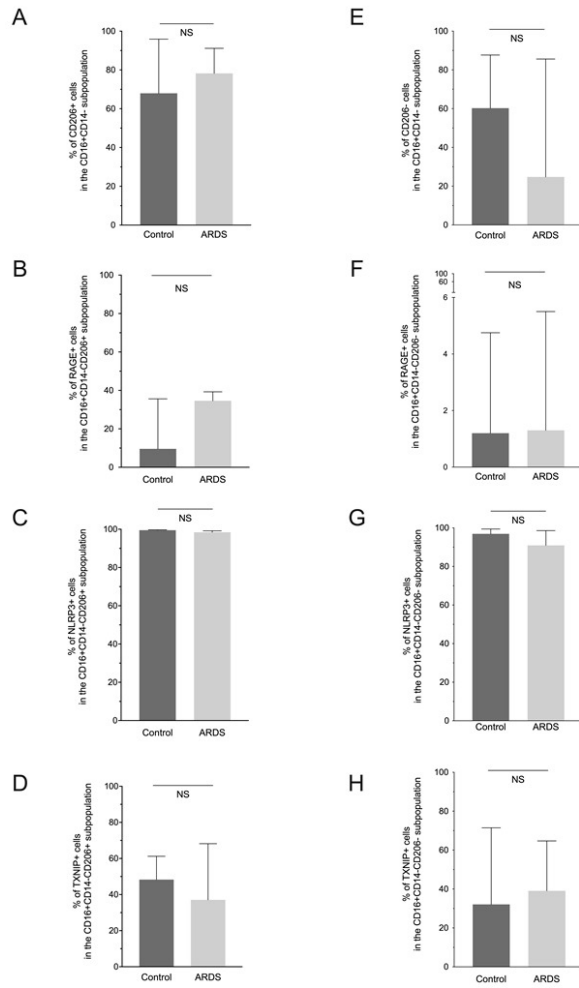

**Figure S7.** Percentages of **A)** CD206+ cells in the CD16+CD14- subpopulation, **B)** RAGE+ cells in the CD16+CD14-CD206+ subpopulation, **C)** NLRP3+ cells in the CD16+CD14-CD206+ subpopulation, **D)** TXNIP+ cells in the CD16+CD14-CD206+ subpopulation, of **E)** CD206- cells in the CD16+CD14- subpopulation, **F)** RAGE+ cells in the CD16+CD14-CD206- subpopulation, **G)** NLRP3+ cells in the CD16+CD14-CD206- subpopulation, and **H)** TXNIP+ cells in the CD16+CD14-CD206- subpopulation of alveolar macrophages from patients with ARDS and in mechanically ventilated patients without ARDS (control). Values are reported as medians  $\pm$  interquartile ranges. The data were analyzed using the Mann–Whitney test (nonparametric data).

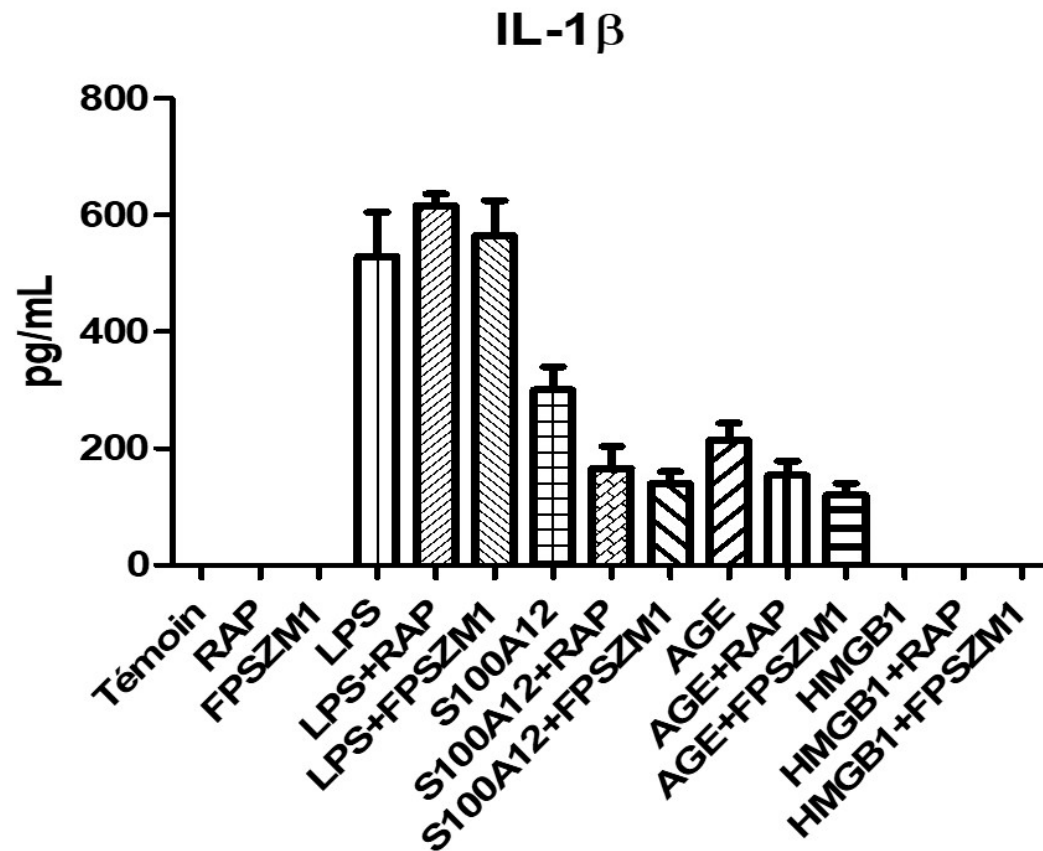

Test RAGE agonist\_THP-1\_IL1b

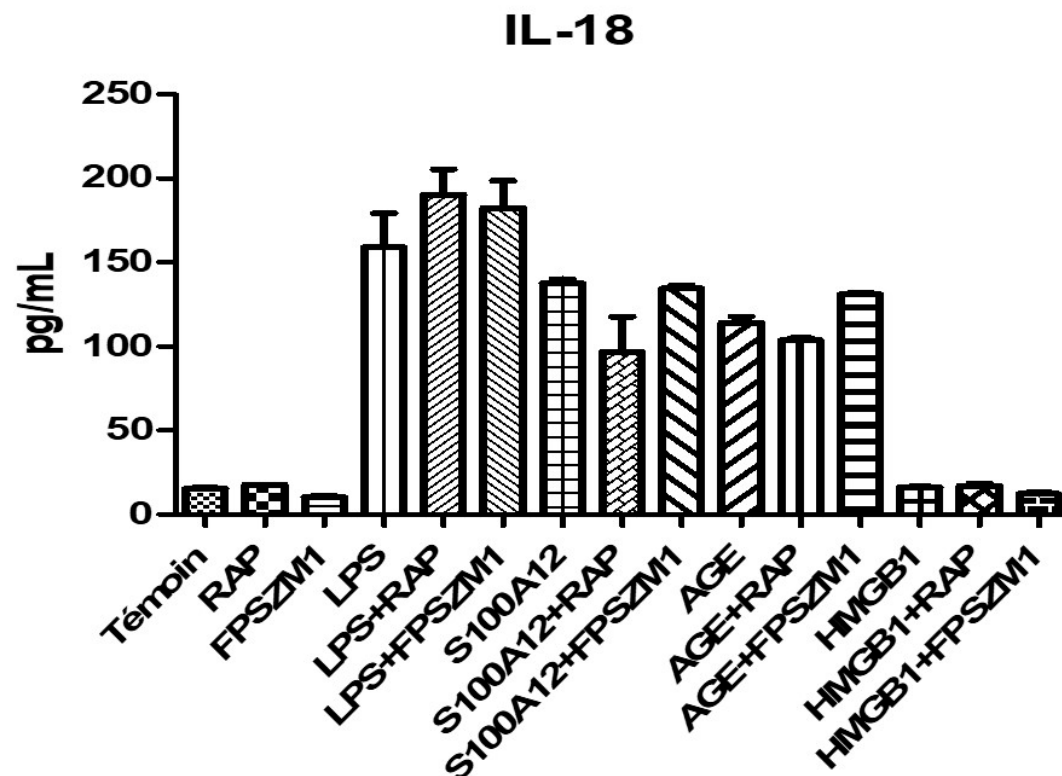

Test RAGE agonist\_THP-1\_IL18

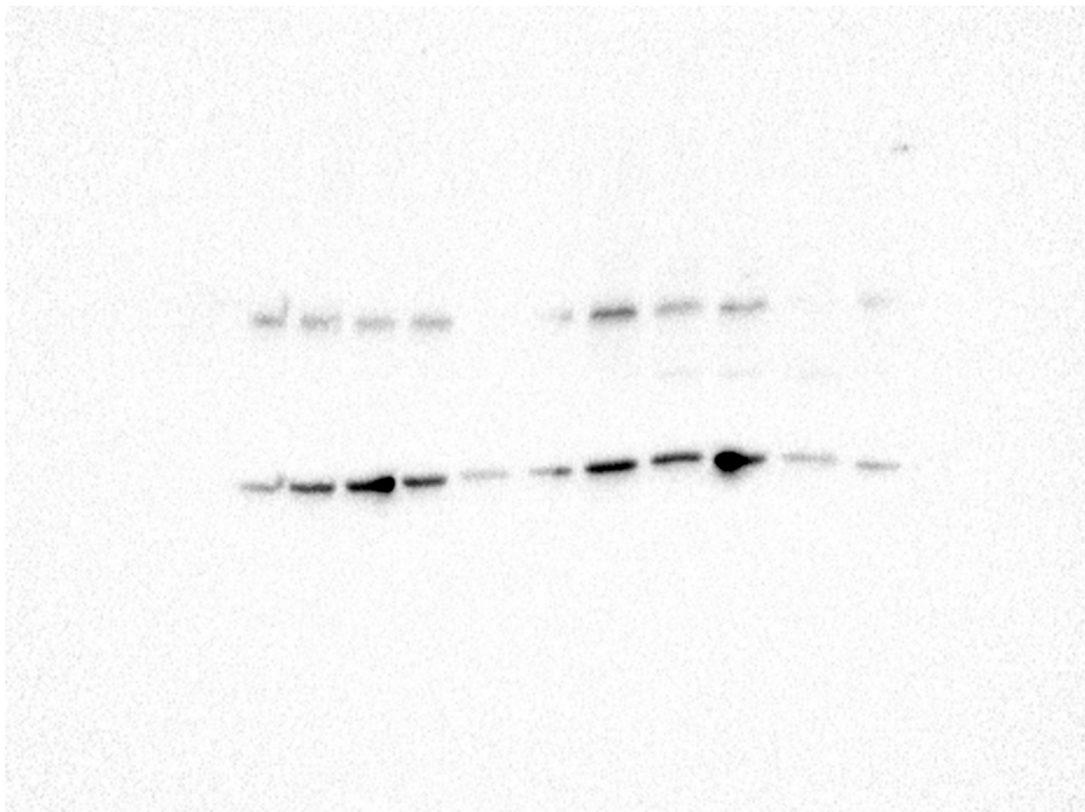

WB\_NLRP3\_S100A12

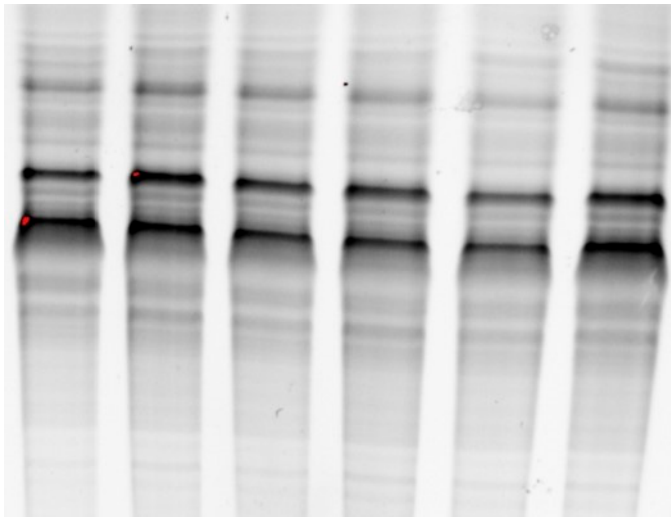

WB\_QuantifProt\_TXNIP\_siRNA

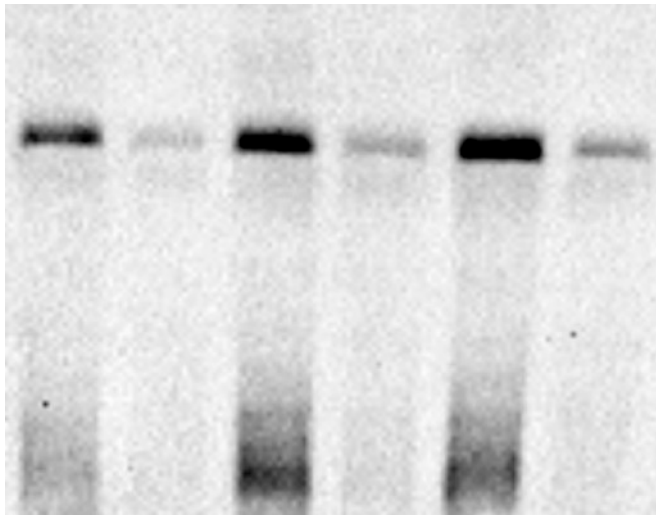

WB\_TXNIP\_siRNA
